# Supplementary material
Source: Frontiers journal article supplement (https://www.frontiersin.org/articles/498786)
Supplement: Table_1.XLSX [file Table_1.XLSX]

## Sheet: Table1
Developper	System	Sensor	Bands	Spatial resolution	Temporal resolution	Coverage	Website	Images	VRP	Timeseries	Reference
LMV	HOTVOLC	SEVIRI	MIR,TIR	~ 5 km	15-30 min	Specific Targets Europe, Africa	http://hotvolc.opgc.fr/www/index.php	x	x	x	Gouhier et al., 2016
HIGP	-	GOES	MIR, TIR	~ 5 km	15-30 min	North, Central, South America; Pacific Ocean	http://goes.higp.hawaii.edu/	x			Patrick et al., 2016
USGS	VOLCVIEW	AVHRR/MODIS/VIIRS/GOES	MIR,TIR	~1km/~5 km	6-12 h/15-30 min	Specific Targets Alaska; Aleutines; Kamchatka;Pacific Ocean	https://volcview.wr.usgs.gov/	x			Shneider et al., 2014
INGV	HOTSAT	MODIS/SEVIRI	MIR,TIR	~1km/~5 km	6-12 h/15-30 min	Specific Targets Europe, Africa	Internal use	x	x	x	Ganci et al., 2011
INGV	AVHotRR	AVHRR/SEVIRI	MIR,TIR	~1km/~5 km	6-12 h/15-30 min	Specific Target	Internal use	x	x	x	Lombardo et al., 2016
IMAA	RSTvolc	AVHRR/MODIS	MIR, TIR	~ 1 km	6-12 h	Specific Target	Intarnal use	x	x	x	Pergola et al., 2016
AVO	-	AVHRR/MODIS/VIIRS	MIR,TIR	350 m/~ 1 km	6-12 h	Specific Targets Alaska; Aleutines; Kamchatka	http://avo.images.alaska.edu/tools/ftp_browser.php	x			Dean et al., 2002
HIGP	MODVOLC	MODIS	MIR, TIR	~ 1 km	6-12 h	Global	http://modis.higp.hawaii.edu/		x	x	Wright et al., 2004
UNITO	MIROVA	MODIS	MIR, TIR	~ 1 km	6-12 h	Specific Targets - Global scale	http://www.mirovaweb.it/	x	x	x	Coppola et al., 2016
KVERT	VOLSATVIEW	AVHRR/MODIS/VIIRS	MIR, TIR	~ 1 km	1-2 h	Specific Targets - Kamchatcka&Kuriles	http://volcanoes.smislab.ru/static/index.sht	x	x		Gordeev et al., 2016
UNI TOKYO	REALVOLC	MODIS	MIR, TIR	~ 1 km	6-12 h	Specific Targets Asia;Oceania; North, Central, South America	http://vrsserv2.eri.u-tokyo.ac.jp/	x		x	Kaneko et al., 2010
NOAA	NIGHTFIRE	VIIRS	SWIR/MIR	~ 1 km	6-12 h	Global	https://ngdc.noaa.gov/eog/viirs/download_viirs_fire.html		x		Elvidge et al., 2013
NASA	FIRMS	VIIRS/MODIS	MIR, TIR	350 m/~ 1 km	6-12 h	Global	https://firms.modaps.eosdis.nasa.gov/		x		Davies et al., 2009
JPL	AVA	ASTER	TIR	~ 90 m	variable, typically > 16 days	Specific Targets - Global	https://ava.jpl.nasa.gov/	x			Linick et al., 2014
GSJ	ASTER Image Database	ASTER	TIR	~ 90 m	variable, typically > 16 days	Specific Targets - Global	https://gbank.gsj.jp/vsidb/image/index-E.html	x			Urai (2011)
Cornell University	AVTOV	ASTER	TIR	~ 90 m	variable, typically > 16 days	Specific Targets - Latin America	https://www.wovodat.org/			x	Reath et al., 2019
GFZ	MOUNTS	SENTINEL 2	SWIR	~ 30 m	5 days	Specific Targets - Global	http://mounts-project.com/home	x		x	Valade et al., 2019
