# Supplementary material
Source: Frontiers journal article supplement (https://www.frontiersin.org/articles/498786)
Supplement: Table_2.XLSX [file Table_2.XLSX]

## Sheet: Table2
Country	Observatory/Institution	Acronym	Thermal system	holocene volcanoes	MIROVA targets
Chile	Servicio Nacional de Geologia y Mineria	SERNAGEOMIN	MIROVA, MODVOLC, FIRMS	99	15
Colombia	Servicio Geologico Colombiano	SGC	MIROVA, MODVOLC, FIRMS, REALVOLC, ASTER	15	6
Dem Rep. Congo	Goma Volcano Observatory	GVO	MIROVA	5	4
Ecuador	Instituto Geofisco Escuela Politecnica Nacional	IGEPN	MIROVA, MODVOLC, FIRMS	34	24
France	Institute de Phisique du Globe de Paris	IPGP	MIROVA, HOTVOLC, ASTER	20	3
Guatemala	Instituto Nacional de Sismologia, Vulcanologia, Meterologia e Hidrologia	INSIVUMEH	MIROVA	22	3
Iceland	Icelandic Meteorological Office	IMO	MIROVA	30	10
Indonesia	Center for Volcanology and Geological Hazard Mitigation	CVGHM	MIROVA, MODVOLC, REALVOLC	125	23
Italy	Università di Firenze (Laboratorio Geofisica Sperimentale)	LGS	MIROVA	15	5
Mexico	University of Colima	UCOL	MIROVA	38	3
Netherlands	Royal Netherlands Meteorological Institute	KNMI	MIROVA	2	1
Papua New Guinea	Geological Survey of Papua New Guinea	RVO	MIROVA	49	9
Perú	Instituto Geofisico del Perù	IGP	MIROVA	16	16
Perú	Instituto Geologico Minero y Metalurgico	INGEMMET	MIROVA	-	-
Perú	Universidad Nacional de San Agustine de Arequipa	UNSA	MIROVA	-	-
USA	U.S. Geological Survey	USGS	MIROVA, MODVOLC, FIRMS, REALVOLC, ASTER	167	14
Vanuatu	Vanuatu Meteorology & Geo-Hazards Department	VMGD	MIROVA, MODVOLC	14	5
Total				651	141
